# Supplementary material for: Evolution of Pt truncated octahedra to nanodendrites during the synthesis in methanol–water solution
Source: Royal Society of Chemistry journal article supplement (doi:10.1039/d1ce00078k), 2021-01-01
Supplement: d1ce00078k1.pdf [file d1ce00078k1.pdf]

## Electronic Supplementary Information

### Evolution of Pt truncated octahedra to nanodendrites during the synthesis in methanol-water solution

Di Zhou,<sup>ab</sup> Shaobo Han,<sup>a</sup> Yong Li,<sup>\*a</sup> Na Ta,<sup>a</sup> Yan Zhou,<sup>a</sup> Mingrun Li,<sup>a</sup> Shu Miao<sup>a</sup> and Wenjie Shen<sup>a</sup>

<sup>a</sup> State Key Laboratory of Catalysis, Dalian Institute of Chemical Physics, Chinese Academy of  
Sciences, Dalian 116023, China

<sup>b</sup> University of Chinese Academy of Sciences, Beijing 100049, China

\*E-mail: yongli@dicp.ac.cn

Table S1 Sizes of the Pt particles synthesized at different CH<sub>3</sub>OH/H<sub>2</sub>O ratios.

| CH <sub>3</sub> OH/H <sub>2</sub> O ratio | Crystallite size (nm) <sup>a</sup> | Particle size (nm) <sup>b</sup> |
|-------------------------------------------|------------------------------------|---------------------------------|
| Pure CH <sub>3</sub> OH                   | 4.0                                | 4.7                             |
| 9/1                                       | 3.1                                | 3.5                             |
| 6/4                                       | 4.5                                | 7.5                             |
| 5/5                                       | 4.9                                | 9.7                             |
| 4/6                                       | 5.4                                | 13.5                            |

<sup>a</sup>Calculated from the {111} diffraction lines by Scherrer's equation.

<sup>b</sup>Determined by statistical analysis of around 900 particles in the TEM images.

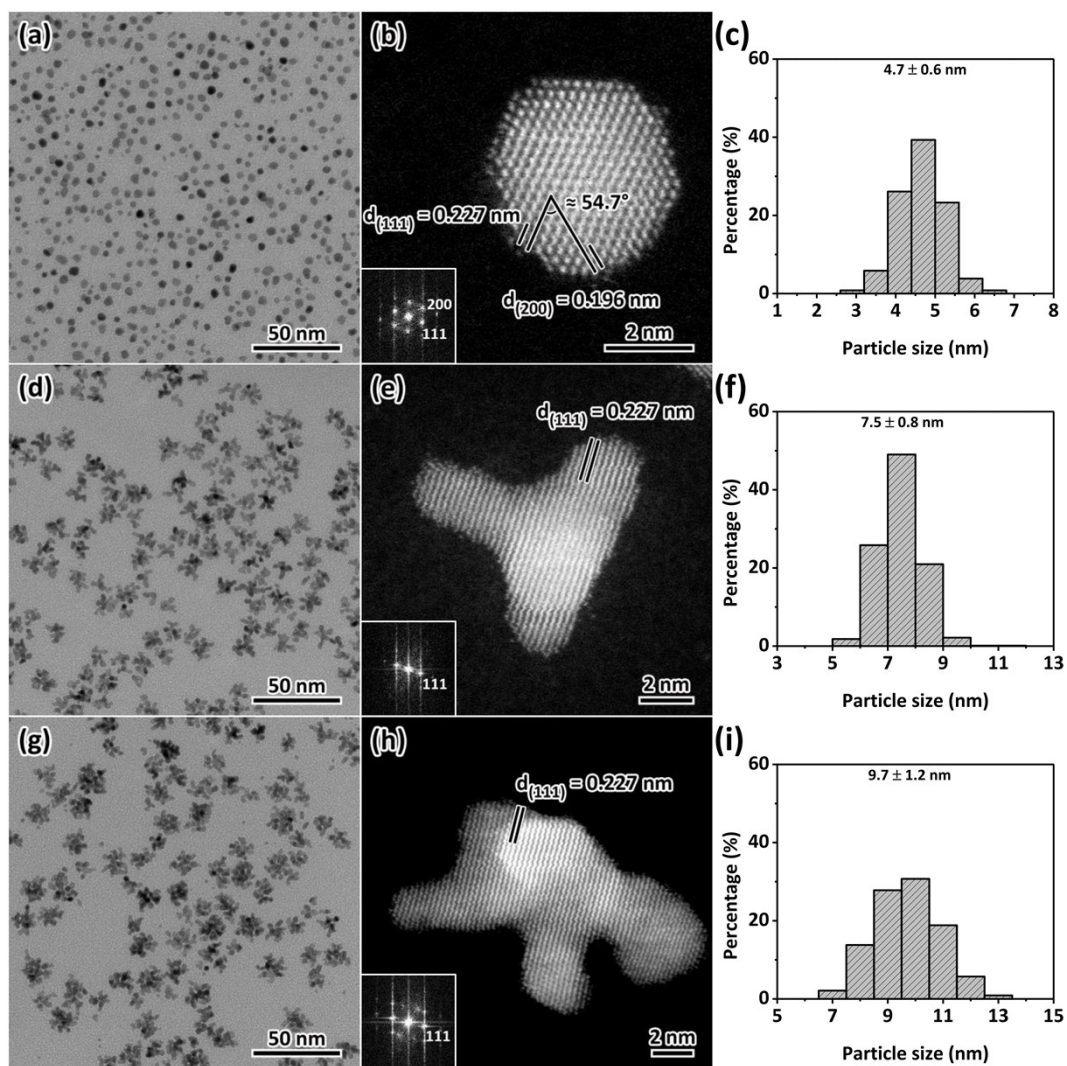

Fig. S1 TEM/STEM images and size distributions of the Pt particles synthesized in pure CH<sub>3</sub>OH (a-c), and at CH<sub>3</sub>OH/H<sub>2</sub>O ratios of 6/4 (d-f) and 5/5 (g-i). The size distributions were determined by counting about 900 particles in the TEM images for each sample.

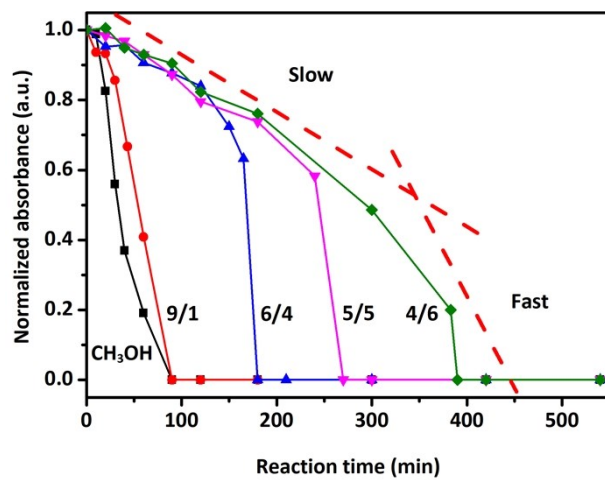

Fig. S2 The normalized absorption of PVP-[PtCl<sub>6-x</sub>(H<sub>2</sub>O)<sub>x</sub>]<sup>x-2</sup> species during the synthesis at varying CH<sub>3</sub>OH/H<sub>2</sub>O ratios.

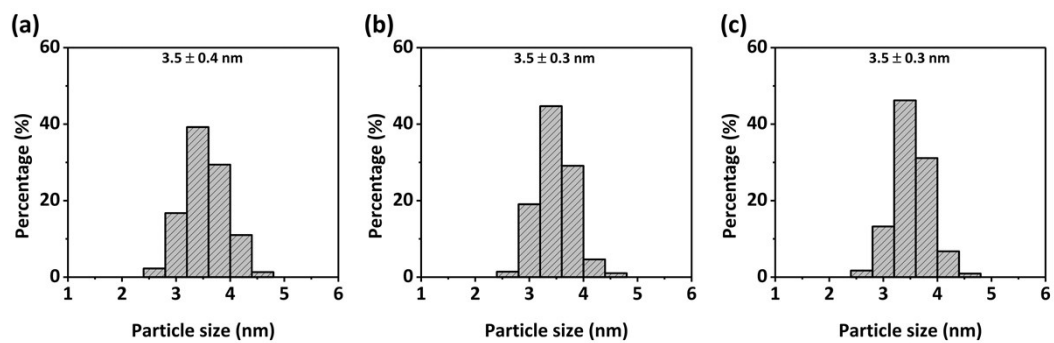

Fig. S3 Size distributions of the intermediate products at 60 min (a), 300 min (b), and 540 min (c) during the synthesis at the CH<sub>3</sub>OH/H<sub>2</sub>O ratio of 9/1.

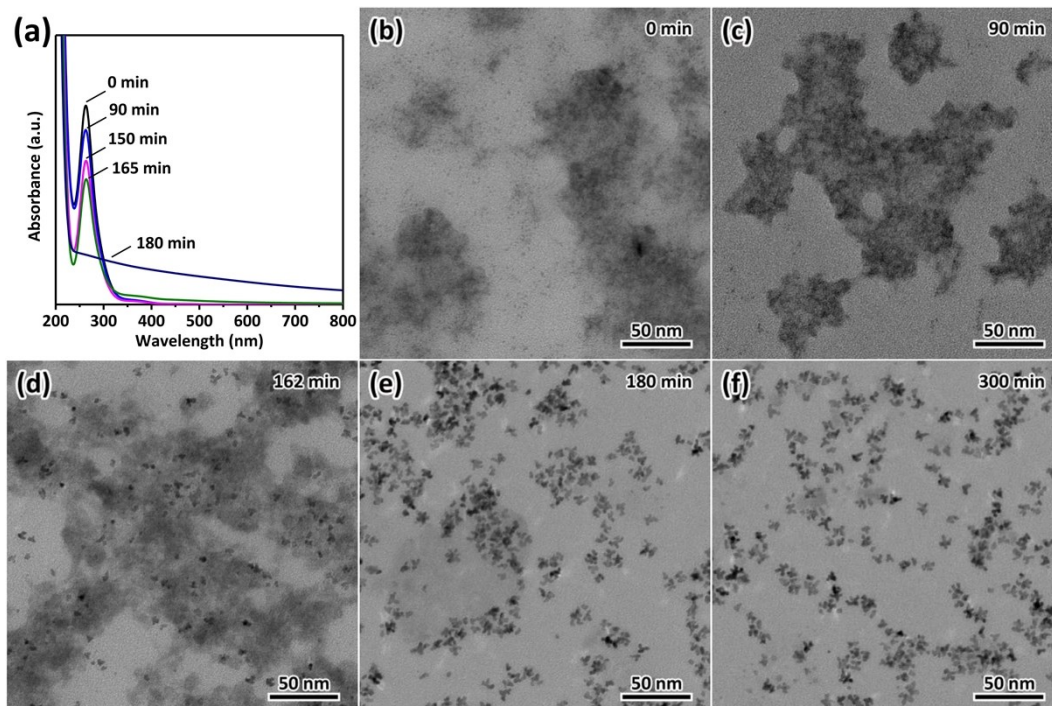

Fig. S4 UV-Vis spectra (a) of the synthetic solution and TEM images (b-f) of the intermediate products during the synthesis at the  $\text{CH}_3\text{OH}/\text{H}_2\text{O}$  ratio of 6/4.

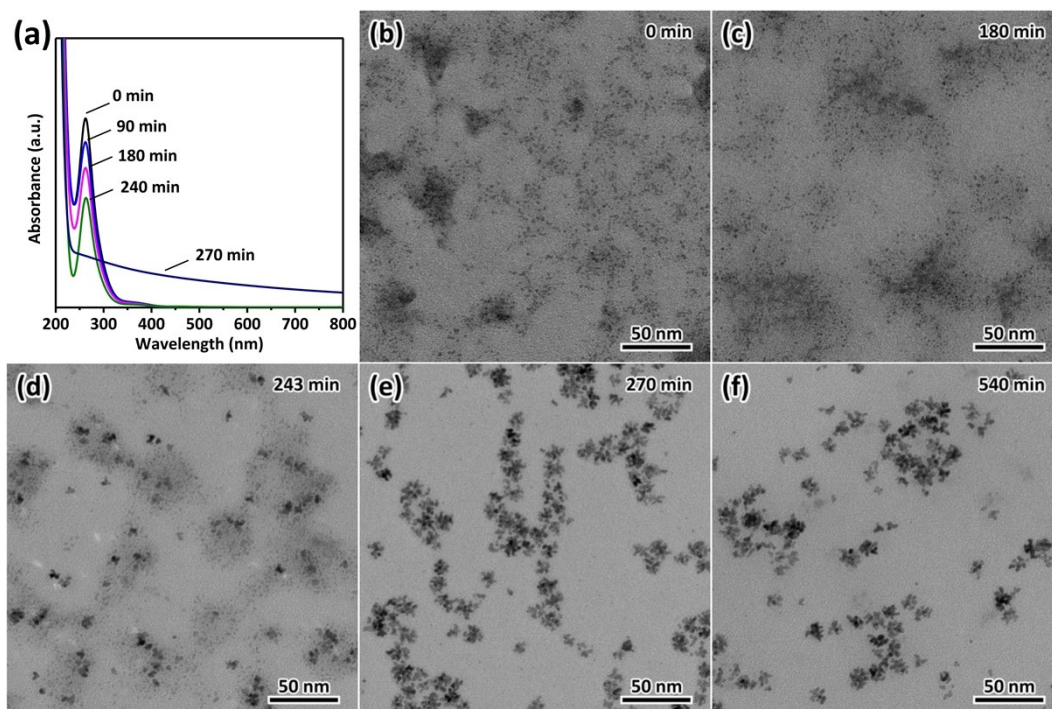

Fig. S5 UV-Vis spectra (a) of the synthetic solution and TEM images (b-f) of the intermediate products during the synthesis at the  $\text{CH}_3\text{OH}/\text{H}_2\text{O}$  ratio of 5/5.

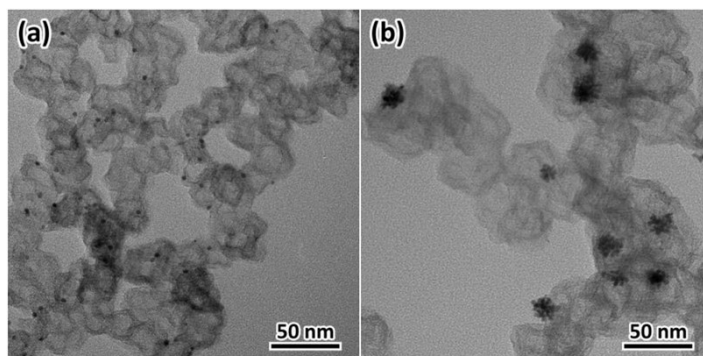

Fig. S6 TEM images of the Pt(9/1)/C (a) and Pt(4/6)/C (b) catalysts after catalytic tests.
